# Supplementary material for: The Chlamydia effector CpoS modulates the inclusion microenvironment and restricts the interferon response by acting on Rab35
Source: PubMed Central journal article supplement (PMC10470785; doi:10.1128/mbio.03190-22), 2023-08-02
Supplement: mbio.03190-22-s0010.pdf [file mbio.03190-22-s0010.pdf]

**Table S1. Designations of Inc proteins mentioned in this study.** Listed are CTL and CT locus tag designations (referring to genes in *C. trachomatis* L2/434/Bu and *C. trachomatis* D/UW-3/Cx, respectively) of all Incs mentioned. For CpoS, designations of additional orthologs mentioned in the study are listed as well.

| <b>Inc protein</b> | <b><i>Chlamydia</i> strain</b>  | <b>Locus tag</b> | <b>Other designation used in this study for simplicity</b> |
|--------------------|---------------------------------|------------------|------------------------------------------------------------|
| CpoS               | <i>C. trachomatis</i> L2/434/Bu | CTL0481          | CpoS(L2)                                                   |
|                    | <i>C. trachomatis</i> D/UW-3/Cx | CT229            | CpoS(D)                                                    |
|                    | <i>C. trachomatis</i> A/HAR-13  | CTA0251          | CpoS(A)                                                    |
|                    | <i>C. trachomatis</i> E/Bour    | BOUR00241        | CpoS(E)                                                    |
|                    | <i>C. muridarum</i> Nigg        | TC0500           | CpoS(Cm)                                                   |
|                    | <i>C. suis</i> MD56             | Q499_0250        | CpoS(Cs)                                                   |
| IPAM               | <i>C. trachomatis</i> L2/434/Bu | CTL0476          | IPAM(L2)                                                   |
|                    | <i>C. trachomatis</i> D/UW-3/Cx | CT223            | IPAM(D)                                                    |
| IncA               | <i>C. trachomatis</i> L2/434/Bu | CTL0374          | IncA(L2)                                                   |
|                    | <i>C. trachomatis</i> D/UW-3/Cx | CT119            | IncA(D) – <i>term not used explicitly in this study</i>    |
| IncB               | <i>C. trachomatis</i> L2/434/Bu | CTL0484          | IncB(L2) – <i>term not used explicitly in this study</i>   |
|                    | <i>C. trachomatis</i> D/UW-3/Cx | CT232            | IncB(D) – <i>term not used explicitly in this study</i>    |
| IncD               | <i>C. trachomatis</i> L2/434/Bu | CTL0370          | IncD(L2)                                                   |
|                    | <i>C. trachomatis</i> D/UW-3/Cx | CT115            | IncD(D)                                                    |
| unnamed            | <i>C. trachomatis</i> L2/434/Bu | CTL0475          |                                                            |
|                    | <i>C. trachomatis</i> D/UW-3/Cx | CT222            |                                                            |

**Table S2. *Chlamydia* strains used in this study.**

| <b>Strain name</b>                                      | <b>Short name</b>                                  | <b>Description</b>                                                                                                                                                                                                                                                  | <b>CpoS variant expressed</b>                                                  |
|---------------------------------------------------------|----------------------------------------------------|---------------------------------------------------------------------------------------------------------------------------------------------------------------------------------------------------------------------------------------------------------------------|--------------------------------------------------------------------------------|
| CTL2                                                    | CTL2                                               | <i>C. trachomatis</i> strain L2/434/Bu                                                                                                                                                                                                                              | Endogenous CpoS(L2)                                                            |
| CTL2- <i>cpoS</i> :: <i>cat</i>                         | CTL2- <i>cpoS</i> :: <i>cat</i>                    | Derived from CTL2, <i>cat</i> insertion in <i>cpoS</i>                                                                                                                                                                                                              | CpoS(L2) truncated after aa 92                                                 |
| CTL2- <i>ipaM</i> :: <i>bla</i>                         | CTL2- <i>ipaM</i> :: <i>bla</i>                    | Derived from CTL2, <i>bla</i> insertion in <i>ipaM</i>                                                                                                                                                                                                              | Endogenous CpoS(L2)                                                            |
| CTL2- <i>ipaM</i> :: <i>bla-cpoS</i> :: <i>cat</i>      | CTL2- <i>ipaM</i> :: <i>bla-cpoS</i> :: <i>cat</i> | Derived from CTL2, <i>bla</i> insertion in <i>ipaM</i> , <i>cat</i> insertion in <i>cpoS</i>                                                                                                                                                                        | CpoS(L2) truncated after aa 92                                                 |
| CTL2- <i>cpoS</i> :: <i>cat</i> / pCpoS(L2)-FLAG        | pCpoS(L2)                                          | Derived from CTL2- <i>cpoS</i> :: <i>cat</i> , transformed with plasmid enabling expression of FLAG-tagged CpoS from <i>C. trachomatis</i> strain L2/434/Bu (CTL0481)                                                                                               | Plasmid-expressed CpoS(L2)-FLAG                                                |
| CTL2- <i>cpoS</i> :: <i>cat</i> / pCpoS(A)-FLAG         | pCpoS(A)                                           | Derived from CTL2- <i>cpoS</i> :: <i>cat</i> , transformed with plasmid enabling expression of FLAG-tagged CpoS from <i>C. trachomatis</i> strain A/HAR-13 (CTA0251)                                                                                                | Plasmid-expressed CpoS(A)-FLAG                                                 |
| CTL2- <i>cpoS</i> :: <i>cat</i> / pCpoS(D)-FLAG         | pCpoS(D)                                           | Derived from CTL2- <i>cpoS</i> :: <i>cat</i> , transformed with plasmid enabling expression of FLAG-tagged CpoS from <i>C. trachomatis</i> strain D/UW-3/CX (CT229)                                                                                                 | Plasmid-expressed CpoS(D)-FLAG                                                 |
| CTL2- <i>cpoS</i> :: <i>cat</i> / pCpoS(E)-FLAG         | pCpoS(E)                                           | Derived from CTL2- <i>cpoS</i> :: <i>cat</i> , transformed with plasmid enabling expression of FLAG-tagged CpoS from <i>C. trachomatis</i> strain E/Bour (BOUR00241)                                                                                                | Plasmid-expressed CpoS(E)-FLAG                                                 |
| CTL2- <i>cpoS</i> :: <i>cat</i> / pCpoS(Cm)-FLAG        | pCpoS(Cm)                                          | Derived from CTL2- <i>cpoS</i> :: <i>cat</i> , transformed with plasmid enabling expression of FLAG-tagged CpoS from <i>C. muridarum</i> strain Nigg (TC0500)                                                                                                       | Plasmid-expressed CpoS(Cm)-FLAG                                                |
| CTL2- <i>cpoS</i> :: <i>cat</i> / pCpoS(L2Δ60)-FLAG     | pCpoS(L2Δ60)                                       | Derived from CTL2- <i>cpoS</i> :: <i>cat</i> , transformed with plasmid enabling expression of FLAG-tagged CpoS from <i>C. trachomatis</i> strain L2/434/Bu (CTL0481) with a 60 aa C-terminal deletion                                                              | Plasmid-expressed CpoS(L2Δ60)-FLAG                                             |
| CTL2- <i>cpoS</i> :: <i>cat</i> / pCpoS(L2-CC1*)-FLAG   | pCpoS(L2-CC1*)                                     | Derived from CTL2- <i>cpoS</i> :: <i>cat</i> , transformed with plasmid enabling expression of FLAG-tagged CpoS from <i>C. trachomatis</i> strain L2/434/Bu (CTL0481) with two point mutations in CC1 (I99P + L113P)                                                | Plasmid-expressed CpoS(L2-CC1*)-FLAG (=CpoS(L2-I99P-L113P)-FLAG)               |
| CTL2- <i>cpoS</i> :: <i>cat</i> / pCpoS(L2-CC2*)-FLAG   | pCpoS(L2-CC2*)                                     | Derived from CTL2- <i>cpoS</i> :: <i>cat</i> , transformed with plasmid enabling expression of FLAG-tagged CpoS from <i>C. trachomatis</i> strain L2/434/Bu (CTL0481) with two point mutations in CC2 (N181P + L188P)                                               | Plasmid-expressed CpoS(L2-CC2*)-FLAG (=CpoS(L2-N181P-L188P)-FLAG)              |
| CTL2- <i>cpoS</i> :: <i>cat</i> / pCpoS(L2-CC1/2*)-FLAG | pCpoS(L2-CC1/2*)                                   | Derived from CTL2- <i>cpoS</i> :: <i>cat</i> , transformed with plasmid enabling expression of FLAG-tagged CpoS from <i>C. trachomatis</i> strain L2/434/Bu (CTL0481) with two point mutations in CC1 (I99P + L113P) and two point mutations in CC2 (N181P + L188P) | Plasmid-expressed CpoS(L2-CC1/2*)-FLAG (=CpoS(L2-I99P-L113P-N181P-L188P)-FLAG) |

**Table S2 (continued). *Chlamydia* strains used in this study.**

| <b>Strain name</b>                                    | <b>Short name</b>                   | <b>Description</b>                                                                                                                           | <b>CpoS variant expressed</b>  |
|-------------------------------------------------------|-------------------------------------|----------------------------------------------------------------------------------------------------------------------------------------------|--------------------------------|
| CTL2 / pIPAM(L2)-MYC                                  | pIPAM(L2)-MYC                       | Derived from CTL2, transformed with plasmid enabling expression of MYC-tagged IPAM from <i>C. trachomatis</i> strain L2/434/Bu (CTL0476)     | Endogenous CpoS(L2)            |
| CTL2 / pIncA(L2)-MYC                                  | pIncA(L2)-MYC                       | Derived from CTL2, transformed with plasmid enabling expression of MYC-tagged IncA from <i>C. trachomatis</i> strain L2/434/Bu (CTL0374)     | Endogenous CpoS(L2)            |
| CTL2 / pIncD(L2)-MYC                                  | pIncD(L2)-MYC                       | Derived from CTL2, transformed with plasmid enabling expression of MYC-tagged IncD from <i>C. trachomatis</i> strain L2/434/Bu (CTL0370)     | Endogenous CpoS(L2)            |
| CTL2 / p2TK2-SW2-mCherry                              | n/a                                 | Derived from CTL2, transformed with plasmid enabling expression of mCherry                                                                   | Endogenous CpoS(L2)            |
| CTL2- <i>cpoS::cat</i> / p2TK2-SW2-mCherry            | n/a                                 | Derived from CTL2- <i>cpoS::cat</i> , transformed with plasmid enabling expression of mCherry                                                | CpoS(L2) truncated after aa 92 |
| CTL2 / pTL2-tetO-IncB-GFP11x7-FLAG                    | CTL2/pIncB-GFP11                    | Derived from CTL2, transformed with plasmid enabling expression of IncB tagged with seven repeats of GFP11 and a FLAG tag                    | Endogenous CpoS(L2)            |
| CTL2- <i>cpoS::cat</i> / pTL2-tetO-IncB-GFP11x7- FLAG | CTL2- <i>cpoS::cat</i> /pIncB-GFP11 | Derived from CTL2- <i>cpoS::cat</i> , transformed with plasmid enabling expression of IncB tagged with seven repeats of GFP11 and a FLAG tag | CpoS(L2) truncated after aa 92 |

**Table S3. Primers used in this study.**

| <b>Purpose</b>                                                            | <b>Primer name</b>        | <b>Primer sequence (5'→ 3')</b>                                    |
|---------------------------------------------------------------------------|---------------------------|--------------------------------------------------------------------|
| Confirmation of cloned EGFP-Rab constructs                                | pEGFPC1for                | GATCACTCTCGGCATGGAC                                                |
| Retargeting of vector pDFTT3 for disruption of CTL0476                    | IBS-CTL0476               | AAAAAAGCTTATAATTATCCTTACTTCTCTTCTTTGTGCGCCCAGATAGGGTG              |
|                                                                           | EBS1d-CTL0476             | CAGATTGTACAAATGTGGTGATAACAGATAAGTCTTCTTTTATAACTTACCTTTCTTTGT       |
|                                                                           | EBS2-CTL0476              | TGAACGCAAGTTTCTAATTTTCGGTTAGAAGTCGATAGAGGAAAGTGTCT                 |
| Verification of intron insertion into CTL0476                             | CTL0476_seqF              | GACTTGCACACTTAGTATCC                                               |
|                                                                           | CTL0476_seqR              | GGTGGTGCTGTTGTATTGG                                                |
| Verification of intron insertion into CTL0481                             | CTL0481_seqF              | CTCTGCTGTTAATTGACTGC                                               |
|                                                                           | CTL0481_seqR              | GCTACTCTTTTCGCAAAGG                                                |
| Amplification of CpoS orthologs and variants for insertion into p2TK2-SW2 | CTL0481_F <sup>a</sup>    | GGTACCGGTCTGAGAGGGGGTATATCTTTTG                                    |
|                                                                           | CTL0481_R <sup>b</sup>    | GCAGGTACCTTTTTTACGACGGGATGCCTG                                     |
|                                                                           | CTL0481Δ60_R <sup>c</sup> | GCAGGTACCTGTTGCGG CATGACGCTTAC                                     |
|                                                                           | CTA0251_R <sup>d</sup>    | GCAGGTACCTTTTTTACGATGGGATGCCTG                                     |
|                                                                           | TC0500_F <sup>e</sup>     | GGTACCGGTTAGAGAGTCTTTTGGGACTAAATG                                  |
|                                                                           | TC0500_R <sup>f</sup>     | GCAGGTACCCTTCTTCTTAGCTTTAACACA                                     |
| Amplification of IPAM-MYC for insertion into p2TK2-SW2                    | CTL0476-MYC_F             | CTCGTCCACGGTCACCGGTGTTTCGATTTTAAGATTCTTAGTGCAATG                   |
|                                                                           | CTL0476-MYC_R             | GCAGCTAGCTTACAGATCCTCTTCTGAGATGAGTTTTTGTTCACCCGAGAGCCGTAATTGAAATC  |
| Amplification of IncA-MYC for insertion into p2TK2-SW2                    | CTL0374-MYC_F             | CTAGGTGCCACGGTACCGGTATCGTTAATCCAGTCAACAATATTAAT                    |
|                                                                           | CTL0374-MYC_R             | TTAGCTAGCTTACAGATCCTCTTCTGAGATGAGTTTTTGTTCGGAGCTTTTTGTAGAGGGTGATGC |
| Amplification of IncD-MYC for insertion into p2TK2-SW2                    | CTL0370-MYC_F             | CTAAGTTCACGGTACCGGTGCTATCTCTTGTGCTCCGAGTTAAAC                      |
|                                                                           | CTL0370-MYC_R             | TTAGCTAGCTTACAGATCCTCTTCTGAGATGAGTTTTTGTTCGCTCGCCCCTTTTTACTCACCGA  |
| Amplification of OCRL-HA for insertion into pcDNA3.1                      | OCRL_F                    | ATAGGATCCATGGAGCCGCCGCTCCCGGT                                      |
|                                                                           | OCRL_R                    | ATAGCGGCCGCTTAAGCGTAATCTGGAACATCGTATGGGTAGTCTTCTTCGCTCCCAAGCA      |
| Amplification of ACAP2-HA for insertion into pcDNA3.1                     | ACAP2_F                   | GCCGCGGATCCATGAAGATGACTGTGGATTTTCG                                 |
|                                                                           | ACAP2_R                   | ATAGCGGCCGCTTAAGCGTAATCTGGAACATCGTATGGGTAGAATTTCTGTGAATCTTGCT      |

<sup>a</sup> Forward primer used for amplification of CTL0481 and CTL0481Δ60 (*C. trachomatis* L2/434/Bu), CTA0251 (*C. trachomatis* A/HAR-13), CT229 (*C. trachomatis* D/UW-3/CX), and BOUR00241 (*C. trachomatis* E/Bour). <sup>b</sup> Reverse primer used for amplification of CTL0481 (*C. trachomatis* L2/434/Bu), CT229 (*C. trachomatis* D/UW-3/CX), and BOUR00241 (*C. trachomatis* E/Bour). <sup>c</sup> Reverse primer used for amplification of CTL0481Δ60 (*C. trachomatis* L2/434/Bu). <sup>d</sup> Reverse primer used for amplification of CTA0251 (*C. trachomatis* A/HAR-13). <sup>e</sup> Forward primer used for amplification of TC0500 (*C. muridarum* Nigg). <sup>f</sup> Reverse primer used for amplification of TC0500 (*C. muridarum* Nigg).

**Table S4. siRNAs used in this study.**

| <b>Reagent</b>                                   | <b>Vendor</b> | <b>Catalogue Number</b> |
|--------------------------------------------------|---------------|-------------------------|
| siGENOME siRNA SMARTpool targeting human STING   | Dharmacon     | M-024333-00-0005        |
| siGENOME siRNA SMARTpool targeting human Rab1A   | Dharmacon     | M-008283-01-0005        |
| siGENOME siRNA SMARTpool targeting human Rab1B   | Dharmacon     | M-008958-01-0005        |
| siGENOME siRNA SMARTpool targeting human Rab2A   | Dharmacon     | M-010533-01-0005        |
| siGENOME siRNA SMARTpool targeting human Rab2B   | Dharmacon     | M-010370-00-0005        |
| siGENOME siRNA SMARTpool targeting human Rab4A   | Dharmacon     | M-008539-01-0005        |
| siGENOME siRNA SMARTpool targeting human Rab5A   | Dharmacon     | M-004009-00-0005        |
| siGENOME siRNA SMARTpool targeting human Rab8A   | Dharmacon     | M-003905-00-0005        |
| siGENOME siRNA SMARTpool targeting human Rab8B   | Dharmacon     | M-008744-01-0005        |
| siGENOME siRNA SMARTpool targeting human Rab35   | Dharmacon     | M-009781-00-0005        |
| siGENOME siRNA SMARTpool targeting human OCRL    | Dharmacon     | M-010026-01-0005        |
| siGENOME siRNA SMARTpool targeting human ACAP2   | Dharmacon     | M-012811-00-0005        |
| siGENOME siRNA SMARTpool targeting human MICAL1  | Dharmacon     | M-010192-00-0005        |
| siGENOME siRNA SMARTpool targeting human MICALL1 | Dharmacon     | M-015102-01-0005        |
| siGENOME siRNA SMARTpool targeting human FSCN1   | Dharmacon     | M-019576-01-0005        |
| siGENOME siRNA SMARTpool targeting human RUSC2   | Dharmacon     | M-026133-01-0005        |

**Table S5. Primary antibodies used in this study.**

| <b>Reagent</b>                           | <b>Source</b>               | <b>Dilution used in microscopy</b> | <b>Dilution used in western blot</b> |
|------------------------------------------|-----------------------------|------------------------------------|--------------------------------------|
| mouse-anti-FLAG                          | Merck (F1804)               | 1:250-1:500                        |                                      |
| mouse-anti-FLAG                          | Merck (F3165)               | 1:250-1:500                        | 1:1000                               |
| rabbit-anti-FLAG                         | Merck (F7425)               |                                    | 1:1000-1:5000                        |
| rabbit-anti-FLAG                         | Cell signaling (14793)      |                                    | 1:1000                               |
| rabbit-anti-MYC                          | Cell Signaling (2278)       | 1:500                              | 1:1000                               |
| rat-anti-HA                              | Merck (11867423001)         | 1:500                              |                                      |
| rabbit-anti-GFP                          | Cell Signaling (2956)       |                                    | 1:1000                               |
| mouse-anti- $\beta$ -actin               | Cell Signaling (3700)       |                                    | 1:2000-1:5000                        |
| mouse-anti- $\beta$ -actin (HRP-labeled) | Abcam (ab49900)             |                                    | 1:50,000                             |
| mouse-anti- $\alpha$ -tubulin            | Merck (T5168)               | 1:250-1:1000                       |                                      |
| rabbit-anti-Src                          | Cell Signaling (2123)       |                                    | 1:1000                               |
| rabbit-anti-phospho(Tyr416)-Src          | Cell Signaling (6943)       |                                    | 1:1000                               |
| mouse-anti-phospho(Tyr416)-Src           | Merck (05-677)              | 1:100                              |                                      |
| rabbit-anti-CERT                         | Proteintech (15191-1-AP)    | 1:1000                             |                                      |
| rabbit-anti-STING                        | Cell Signaling (13647)      |                                    | 1:1000                               |
| rabbit-anti-phospho(Ser366)-STING        | Cell Signaling (19781)      |                                    | 1:1000                               |
| rabbit-anti-IRF3                         | Cell Signaling (11904)      |                                    | 1:1000                               |
| rabbit-anti-phospho(Ser386)-IRF3         | Cell Signaling (37829)      |                                    | 1:1000                               |
| rabbit-anti-Rab1A                        | Cell Signaling (13075)      |                                    | 1:1000                               |
| rabbit-anti-Rab1B                        | Abcam (ab116336)            |                                    | 1:1000                               |
| rabbit-anti-Rab2A                        | Proteintech (15420-1-AP)    |                                    | 1:1000                               |
| rabbit-anti-Rab2B                        | Proteintech (11756-1-AP)    |                                    | 1:1000                               |
| rabbit-anti-Rab4A                        | Proteintech (10347-1-AP)    |                                    | 1:1000                               |
| rabbit-anti-Rab5A                        | Cell Signaling (46449)      |                                    | 1:1000                               |
| rabbit-anti-Rab8A                        | Cell Signaling (6975)       |                                    | 1:1000                               |
| rabbit-anti-Rab35                        | Proteintech (11329-2-AP)    |                                    | 1:1000                               |
| rabbit-anti-OCRL                         | Proteintech (17695-1-AP)    |                                    | 1:1000                               |
| rabbit-anti-ACAP2                        | Proteintech (14029-1-AP)    |                                    | 1:10000                              |
| rabbit-anti-MICAL1                       | Proteintech (14818-1-AP)    |                                    | 1:1000                               |
| rabbit-anti-MICAL1                       | Proteinatlas (HPA043480-25) |                                    | 1:1000                               |
| rabbit-anti-FSCN1                        | Proteintech (14384-1-AP)    |                                    | 1:1000                               |
| rabbit-anti-RUSC2                        | ProSci (155-6659-0.02)      |                                    | 1:1000                               |
| rabbit-anti-Slc1                         | (1)                         | 1:400                              | 1:1000                               |
| rabbit-anti-CpoS                         | (2)                         |                                    | 1:200                                |

**Table S5 (continued). Primary antibodies used in this study.**

| <b>Reagent</b>            | <b>Source</b>                                             | <b>Dilution used in microscopy</b> | <b>Dilution used in western blot</b> |
|---------------------------|-----------------------------------------------------------|------------------------------------|--------------------------------------|
| rabbit-anti-IncA          | (3)                                                       |                                    | 1:1000                               |
| rabbit-anti-CT222/CTL0475 | gift from Ted Hackstadt<br>(RML/NIAID, (4))               | 1:100                              | 1:1000                               |
| rabbit-anti-IPAM          | gift from Daniel Rockey<br>(Oregon State University, (5)) | 1:100-1:200                        |                                      |
| mouse-anti-IPAM           | gift from Daniel Rockey<br>(Oregon State University, (6)) | 1:1000                             | 1:1000                               |

## References

1. Chen YS, Bastidas RJ, Saka HA, Carpenter VK, Richards KL, Plano GV, Valdivia RH. 2014. The *Chlamydia trachomatis* type III secretion chaperone Slc1 engages multiple early effectors, including TepP, a tyrosine-phosphorylated protein required for the recruitment of Crkl-II to nascent inclusions and innate immune signaling. PLoS Pathog 10:e1003954.
2. Sixt BS, Bastidas RJ, Finethy R, Baxter RM, Carpenter VK, Kroemer G, Coers J, Valdivia RH. 2017. The *Chlamydia trachomatis* inclusion membrane protein CpoS counteracts STING-mediated cellular surveillance and suicide programs. Cell Host Microbe 21:113-121.
3. Cocchiario JL, Kumar Y, Fischer ER, Hackstadt T, Valdivia RH. 2008. Cytoplasmic lipid droplets are translocated into the lumen of the *Chlamydia trachomatis* parasitophorous vacuole. Proc Natl Acad Sci U S A 105:9379-84.
4. Mital J, Miller NJ, Fischer ER, Hackstadt T. 2010. Specific chlamydial inclusion membrane proteins associate with active Src family kinases in microdomains that interact with the host microtubule network. Cell Microbiol 12:1235-49.
5. Alzhanov DT, Weeks SK, Burnett JR, Rockey DD. 2009. Cytokinesis is blocked in mammalian cells transfected with *Chlamydia trachomatis* gene CT223. BMC Microbiol 9:2.
6. Bannantine JP, Griffiths RS, Viratyosin W, Brown WJ, Rockey DD. 2000. A secondary structure motif predictive of protein localization to the chlamydial inclusion membrane. Cell Microbiol 2:35-47.
